# Supplementary material for: Blastocystis One Health Approach in a Rural Community of Northern Thailand: Prevalence, Subtypes and Novel Transmission Routes
Source: PubMed Central journal article supplement (PMC8696170; doi:10.3389/fmicb.2021.746340), 2021-12-09

# ***Blastocystis* One Health approach in a rural community of northern Thailand: prevalence, subtypes and novel transmission routes**

Vasana Jinatham<sup>1</sup>, Sadiya Maxamhud<sup>2</sup>, Siam Popluechai<sup>1,3</sup>, Anastasios D. Tsaousis<sup>2\*</sup> and Eleni Gentekaki<sup>1,3\*</sup>

## **Supplementary Material**

**Supplementary Figure S1:** Typical rain collection vessel used to collect rain water in the studied community.

**Supplementary Figure S2:** Water-dispensing machine, which supplies water to the community

**Supplementary Figure S3:** **A.** Water treatment facility of the community studied. **B.** River, which supplies most of the water used by the community. **C.** water towers with taps at the bottom to facilitate water access

**Supplementary Figure S4:** **A.** River stream overgrown with morning glory. **B.** Artificial pond lined with soil used for fish farming. **C.** Cement contained used to temporarily hold excess fish and amphibians

**Supplementary Figure S5:** Soil sampling sites used in this study.

**Supplementary Figure S6:** Riverbank sampling sites.

**Supplementary Figure S1**

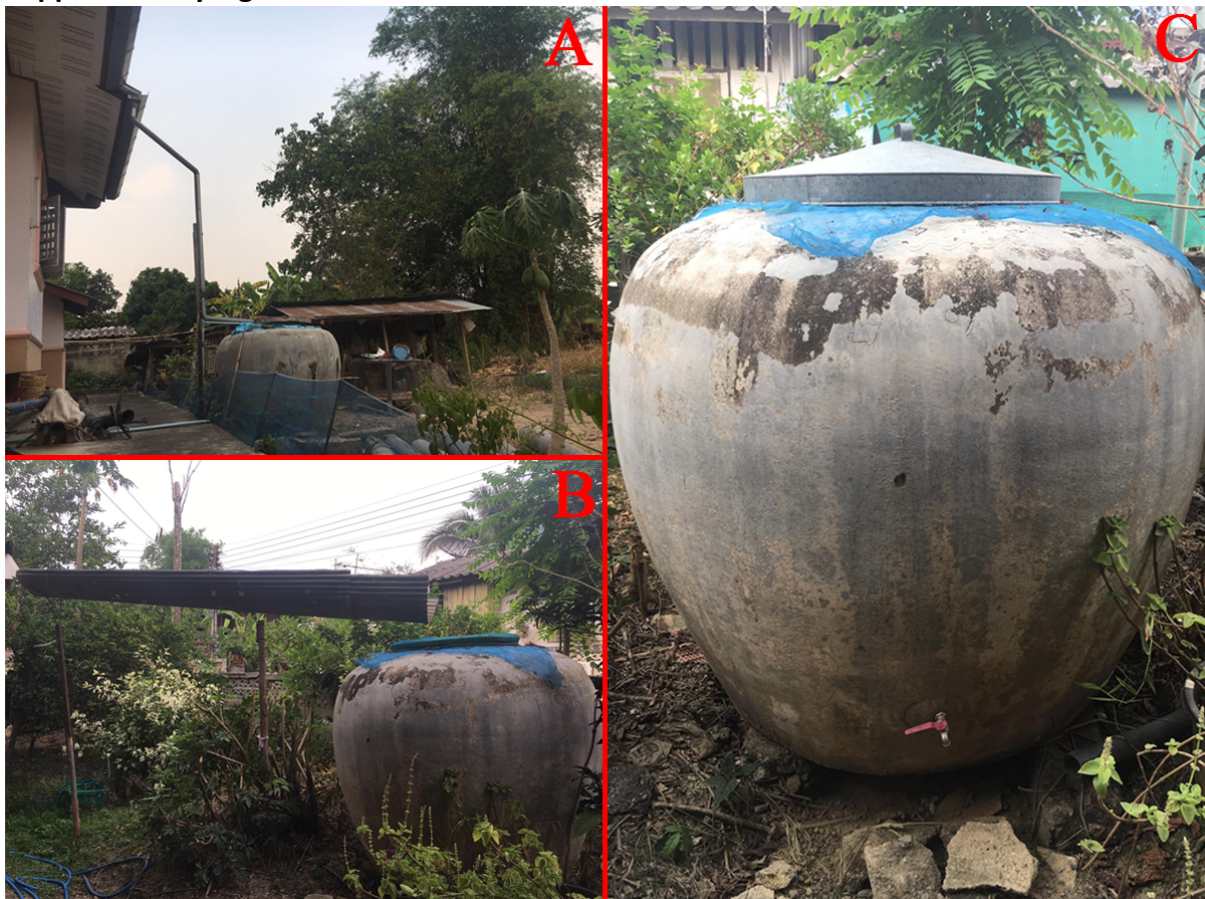



Supplementary Figure S2

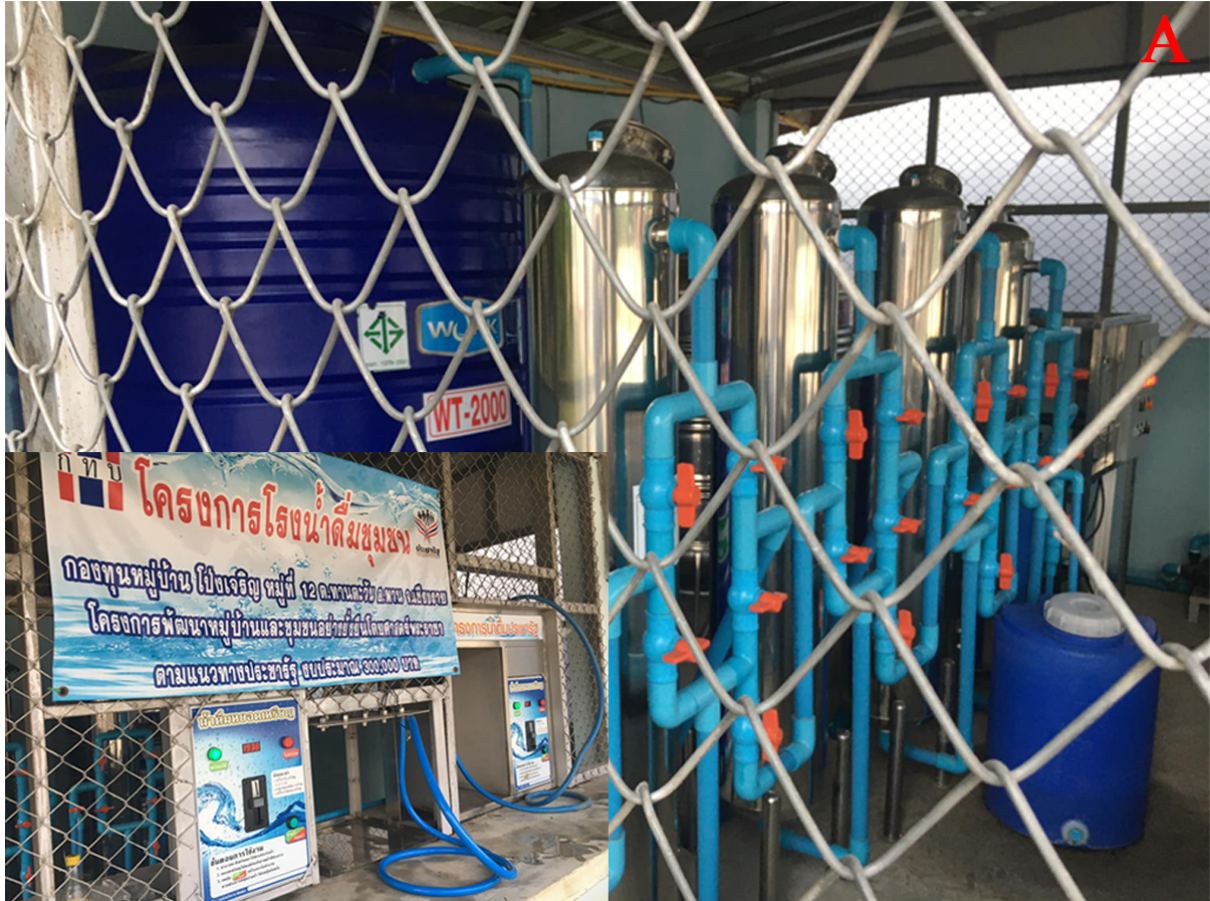

Supplementary Figure S3

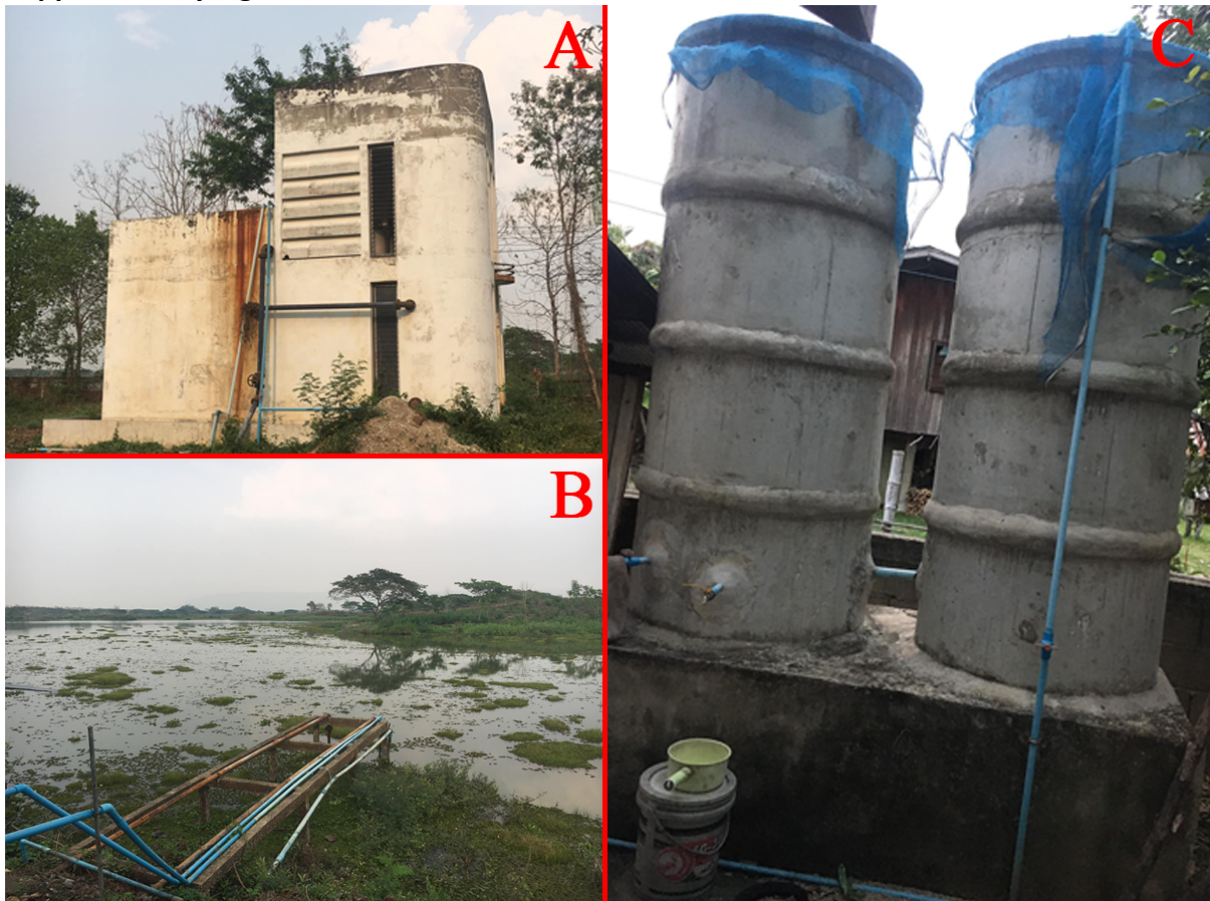



Supplementary Figure S4

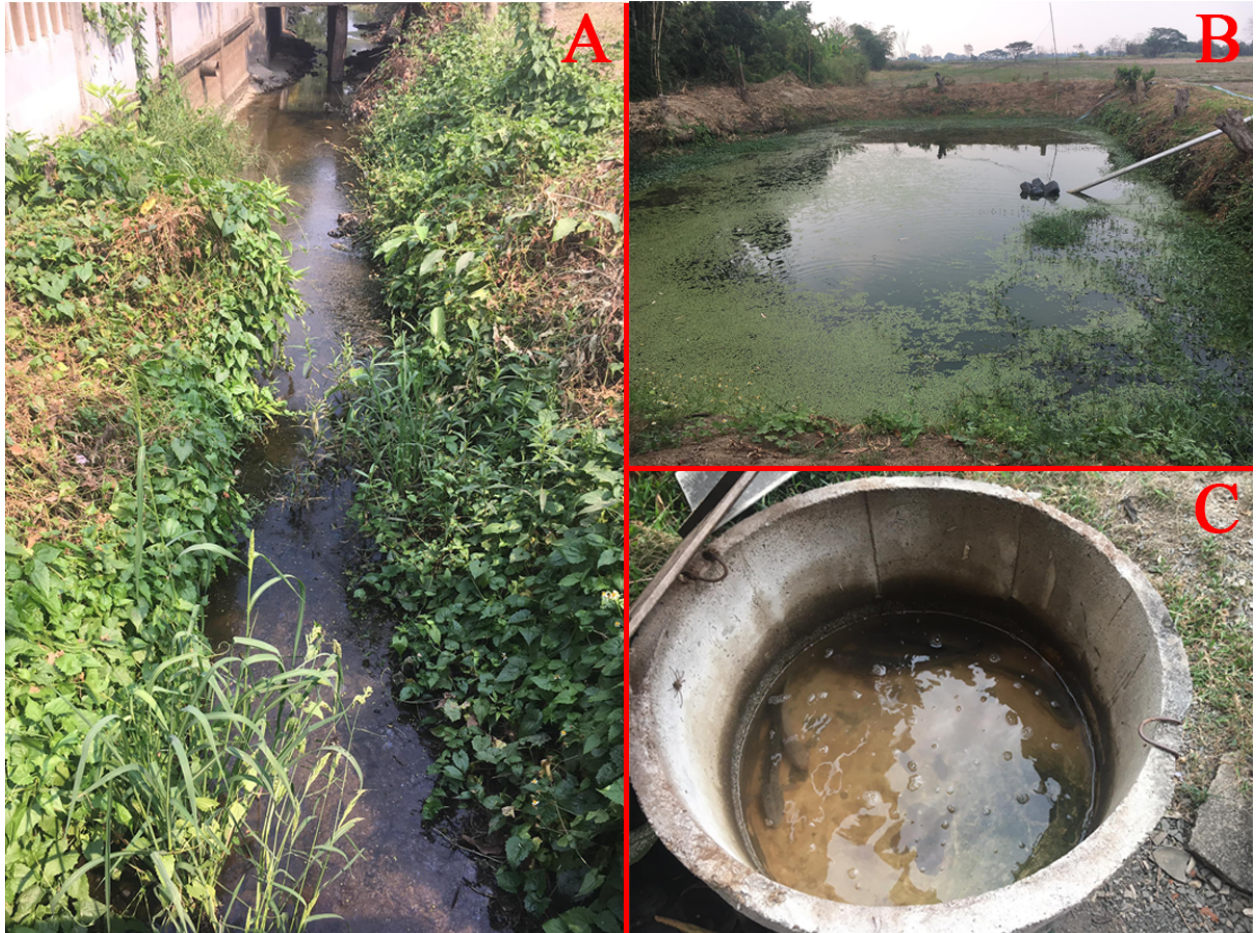

Supplementary Figure S5

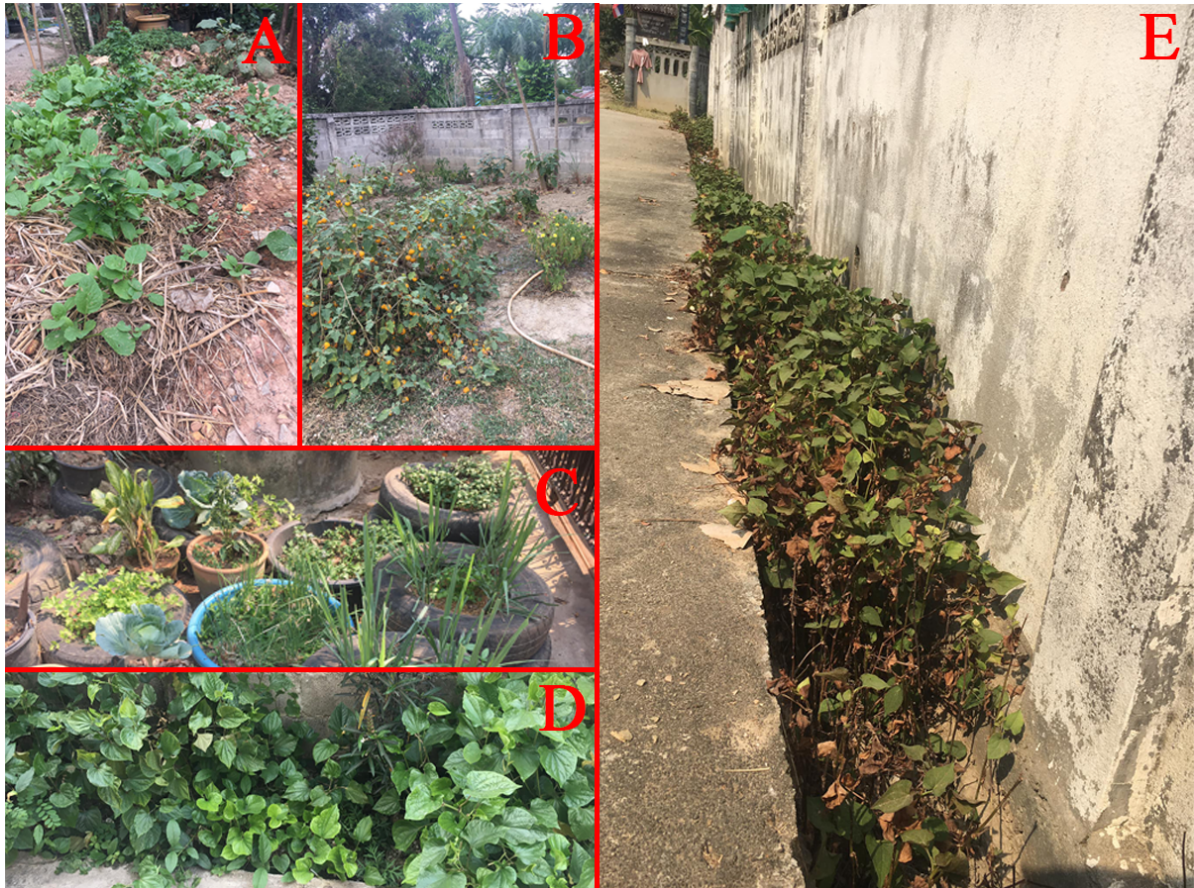



Supplementary Figure S6

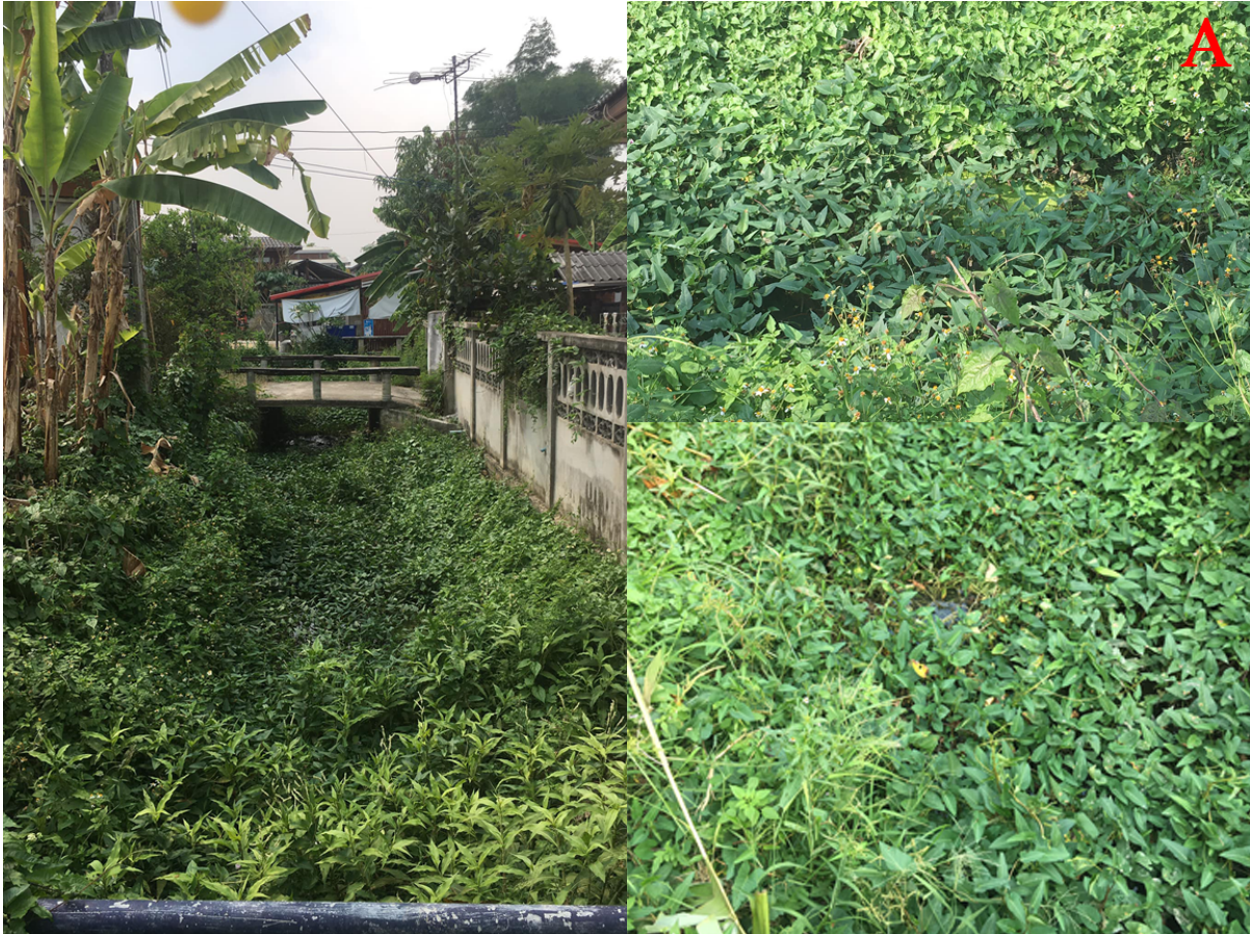

Supplement: Data_Sheet_1.pdf [file Data_Sheet_1.pdf]
